# Supplementary material for: Effects of Environmental Enrichment on Dog Behaviour: Pilot Study
Source: MDPI journal article supplement (doi:10.3390/ani12020141), 2022-01-07
Supplement: s1 [file s1]

# Effects of environmental enrichment on dog behaviour: pilot study

## Supplementary Tables.

**Table S1.** The behaviours coded within each behavioural category.

| Behaviour category | Individual behaviours                                                                                                                                                                                |
|--------------------|------------------------------------------------------------------------------------------------------------------------------------------------------------------------------------------------------|
| Maintenance        | Drinking, self-grooming, stretching, scratching, yawning, body shaking, panting.                                                                                                                     |
| Play               | Tail wagging, tail chasing, dog bow, chewing toys.                                                                                                                                                   |
| Locomotion         | Moving around the pen, reposition of body, rolling, crawling, head tossing, standing up.                                                                                                             |
| Relaxation         | Lying down, asleep, resting, curled up.                                                                                                                                                              |
| Alert              | Sitting upright, looking, ears pricked up, tail up.                                                                                                                                                  |
| Stress             | Whining, grumbling, whimpering, mumbling, barking, jumping upon pen bars, pawing, nosing or biting the pen, circling, pacing, excess panting, lip smacking, repeated yawning, tail between the legs. |

**Table S2.** Mean behaviour change scores for relaxation, alert and stress behaviour for each EE activity.

| EE activity      | Maintenance | Play  | Locomotion | Relaxation | Alert  | Stress |
|------------------|-------------|-------|------------|------------|--------|--------|
| Bonding          | 1.75        | -0.05 | -0.55      | 10.65      | -7.40  | -5.70  |
| Bubble machine   | 4.10        | 0.95  | -0.70      | 14.35      | -10.40 | -8.00  |
| Conspecific play | 20.25       | 0.05  | -2.70      | 18.30      | -16.00 | -10.15 |
| Interactive toy  | 2.50        | 1.40  | -1.10      | 4.25       | -4.40  | -6.35  |
| Playhouse        | 16.70       | 0.35  | 1.20       | 11.85      | -8.30  | -13.20 |
| Stuffed food toy | 1.75        | -0.45 | 0.95       | 1.00       | 0.20   | -1.55  |
| Tug play         | 2.85        | 0.90  | -1.60      | 11.05      | -5.40  | -12.30 |
| Overall mean     | 7.13        | 0.45  | -0.64      | 10.21      | -7.39  | -8.18  |

**Table S3.** Significance values for LSD post hoc pairwise analyses when comparing each EE activity to one another for alert (A), relaxation (R) and stress (S) behaviour categories. A green square indicates a significant increase for relaxation behaviours or a significant decrease for alert and stress behaviours. A red square indicates a significant decrease for relaxation behaviours or a significant increase for alert and stress behaviours

| EE activity                  | Bonding |        |       | Bubble machine |        |       | Conspecific play |        |       | Interactive toy |        |       | Playhouse |        |       | Stuffed food toy |        |       | Tug play |        |       |
|------------------------------|---------|--------|-------|----------------|--------|-------|------------------|--------|-------|-----------------|--------|-------|-----------|--------|-------|------------------|--------|-------|----------|--------|-------|
| Behaviour category           | A       | R      | S     | A              | R      | S     | A                | R      | S     | A               | R      | S     | A         | R      | S     | A                | R      | S     | A        | R      | S     |
| Compared to Bonding          |         |        |       | 0.398          | 0.207  | 0.508 | 0.018            | 1.000  | 0.203 | 0.398           | 0.011  | 0.851 | 0.799     | 0.758  | 0.034 | 0.035            | <0.001 | 0.234 | 0.572    | 1.000  | 0.061 |
| Compared to Bubble machine   | 0.398   | 0.207  | 0.508 |                |        |       | 0.117            | 0.207  | 0.536 | 0.094           | <0.001 | 0.634 | 0.553     | 0.338  | 0.138 | 0.004            | <0.001 | 0.067 | 0.161    | 0.207  | 0.218 |
| Compared to Conspecific play | 0.018   | 1.000  | 0.203 | 0.117          | 0.207  | 0.536 |                  |        |       | 0.002           | 0.011  | 0.276 | 0.033     | 0.758  | 0.381 | <0.001           | <0.001 | 0.016 | 0.004    | 1.000  | 0.536 |
| Compared to Interactive toy  | 0.398   | 0.011  | 0.851 | 0.094          | <0.001 | 0.634 | 0.002            | 0.011  | 0.276 |                 |        |       | 0.273     | 0.005  | 0.052 | 0.197            | 0.214  | 0.170 | 0.777    | 0.011  | 0.090 |
| Compared to Playhouse        | 0.799   | 0.758  | 0.034 | 0.553          | 0.338  | 0.138 | 0.033            | 0.758  | 0.381 | 0.273           | 0.005  | 0.052 |           |        |       | 0.019            | <0.001 | 0.001 | 0.413    | 0.758  | 0.795 |
| Compared to Stuffed food toy | 0.035   | <0.001 | 0.234 | 0.004          | <0.001 | 0.067 | <0.001           | <0.001 | 0.016 | 0.197           | 0.214  | 0.170 | 0.019     | <0.001 | 0.001 |                  |        |       | 0.117    | <0.001 | 0.003 |

---

|                         |       |       |       |       |       |       |       |       |       |       |       |       |       |       |       |       |        |       |  |
|-------------------------|-------|-------|-------|-------|-------|-------|-------|-------|-------|-------|-------|-------|-------|-------|-------|-------|--------|-------|--|
| Compared to Tug<br>play | 0.572 | 1.000 | 0.061 | 0.161 | 0.207 | 0.218 | 0.004 | 1.000 | 0.536 | 0.777 | 0.011 | 0.090 | 0.413 | 0.758 | 0.795 | 0.117 | <0.001 | 0.003 |  |
|-------------------------|-------|-------|-------|-------|-------|-------|-------|-------|-------|-------|-------|-------|-------|-------|-------|-------|--------|-------|--|

---
